# Supplementary material
Source: Research Square preprint supplement (doi:10.21203/rs.3.rs-10347524/v1)
Supplement: Supplementary file 1 [file 73f08a6cc9587715c4e6bc57.docx]

Post hoc analysis showed that participants without depression had significantly higher bilirubin levels compared to all depressed groups (p < 0.001). Significant differences were also observed between most depression severity categories (p < 0.05), except for some comparisons involving adjacent severity levels.

**Supplementary Table S1. Games–Howell Post Hoc Comparisons of Bilirubin Levels Across Depression Severity Groups**

**(A) Total bilirubin**

| **Comparison** | **Mean difference** | **p-value** |
| --- | --- | --- |
| No vs Mild | 0.144 | 0.016 |
| No vs Moderate | 0.272 | <0.001 |
| No vs Moderately severe | 0.462 | <0.001 |
| No vs Severe | 0.443 | <0.001 |
| Mild vs Moderate | 0.128 | <0.001 |
| Mild vs Moderately severe | 0.318 | <0.001 |
| Mild vs Severe | 0.299 | <0.001 |
| Moderate vs Moderately severe | 0.190 | <0.001 |
| Moderate vs Severe | 0.171 | <0.001 |
| Moderately severe vs Severe | 0.019 | 0.823 |

**(B) Direct bilirubin**

| **Comparison** | **Mean difference** | **p-value** |
| --- | --- | --- |
| No vs Mild | 0.023 | 0.135 |
| No vs Moderate | 0.050 | <0.001 |
| No vs Moderately severe | 0.075 | <0.001 |
| No vs Severe | 0.084 | <0.001 |
| Mild vs Moderate | 0.027 | <0.001 |
| Mild vs Moderately severe | 0.052 | 0.019 |
| Mild vs Severe | 0.062 | <0.001 |
| Moderate vs Moderately severe | 0.025 | 0.500 |
| Moderate vs Severe | 0.035 | <0.001 |
| Moderately severe vs Severe | 0.010 | 0.972 |
